1  
2  
3  
4  
5  
6  
7  
8  
9  
10  
11  
12  
13  
14  
15  
16  
17  
18  
19  
20  
21  
22  
23

# Protective efficacy of rhesus adenovirus COVID-19 vaccines against mouse-adapted SARS-CoV-2

Lisa H. Tostanoski<sup>1¶</sup>, Lisa E. Gralinski<sup>2¶</sup>, David R. Martinez<sup>2¶</sup>, Alexandra Schaefer<sup>2¶</sup>, Shant H. Mahrokhian<sup>1</sup>, Zhenfeng Li<sup>1</sup>, Felix Nampanya<sup>1</sup>, Huahua Wan<sup>1</sup>, Jingyou Yu<sup>1</sup>, Aiquan Chang<sup>1,4</sup>, Jinyan Liu<sup>1</sup>, Katherine McMahan<sup>1</sup>, Kenneth H. Dinno<sup>2</sup>, Sarah R. Leist<sup>2</sup>, Ralph S. Baric<sup>2</sup>, Dan H. Barouch<sup>1,3,4,5,\*</sup>

- <sup>1</sup> Center for Virology and Vaccine Research, Beth Israel Deaconess Medical Center, Harvard Medical School, Boston, MA, USA.
- <sup>2</sup> Department of Epidemiology, University of North Carolina at Chapel Hill, Chapel Hill, NC, USA.
- <sup>3</sup> Ragon Institute of MGH, MIT and Harvard, Cambridge, MA, USA.
- <sup>4</sup> Harvard Medical School, Boston, MA, USA.
- <sup>5</sup> Massachusetts Consortium on Pathogen Readiness, Boston, MA, USA.

\*Corresponding author  
Email: [dbarouch@bidmc.harvard.edu](mailto:dbarouch@bidmc.harvard.edu) (DHB)

¶These authors contributed equally to this work.

## 24 **Abstract**

25           The global COVID-19 pandemic has sparked intense interest in the rapid development of  
26 vaccines as well as animal models to evaluate vaccine candidates and to define immune correlates  
27 of protection. We recently reported a mouse-adapted SARS-CoV-2 virus strain (MA10) with the  
28 potential to infect wild-type laboratory mice, driving high levels of viral replication in respiratory  
29 tract tissues as well as severe clinical and respiratory symptoms, aspects of COVID-19 disease in  
30 humans that are important to capture in model systems. We evaluated the immunogenicity and  
31 protective efficacy of novel rhesus adenovirus serotype 52 (RhAd52) vaccines against MA10  
32 challenge in mice. Baseline seroprevalence is lower for rhesus adenovirus vectors than for human  
33 or chimpanzee adenovirus vectors, making these vectors attractive candidates for vaccine  
34 development. We observed that RhAd52 vaccines elicited robust binding and neutralizing  
35 antibody titers, which inversely correlated with viral replication after challenge. These data support  
36 the development of RhAd52 vaccines and the use of the MA10 challenge virus to screen novel  
37 vaccine candidates and to study the immunologic mechanisms that underscore protection from  
38 SARS-CoV-2 challenge in wild-type mice.

39

## 40 **Importance**

41           We have developed a series of SARS-CoV-2 vaccines using rhesus adenovirus serotype 52  
42 (RhAd52) vectors, which exhibits a lower seroprevalence than human and chimpanzee vectors,  
43 supporting their development as novel vaccine vectors or as an alternative Ad vector for boosting.  
44 We sought to test these vaccines using a recently reported mouse-adapted SARS-CoV-2 (MA10)  
45 virus to i) evaluate the protective efficacy of RhAd52 vaccines and ii) further characterize this  
46 mouse-adapted challenge model and probe immune correlates of protection. We demonstrate

47 RhAd52 vaccines elicit robust SARS-CoV-2-specific antibody responses and protect against  
48 clinical disease and viral replication in the lungs. Further, binding and neutralizing antibody titers  
49 correlated with protective efficacy. These data validate the MA10 mouse model as a useful tool to  
50 screen and study novel vaccine candidates, as well as the development of RhAd52 vaccines for  
51 COVID-19.

52

## 53 **Introduction**

54 A critical component of the evaluation of vaccine candidates for COVID-19 has been the  
55 development of pre-clinical challenge models. Transgenic mice [1-5], hamsters [6-9], and non-  
56 human primates [10-12] have been shown to support viral replication and, to varying degrees,  
57 clinical disease following infection with SARS-CoV-2 [13]. We recently described a mouse-  
58 adapted virus (MA10) to enable challenge of standard, wild-type laboratory mice and recapitulate  
59 several key features of human disease, such as viral replication in respiratory tract tissues and  
60 severe infection-associated weight loss [14]. This model has been explored to evaluate small  
61 molecule antivirals and candidate monoclonal antibodies for prophylactic or therapeutic  
62 applications, as well as prototype vaccine candidates [14-17]. For example, initial studies using  
63 viral replicon particles expressing SARS-CoV-2 Spike protein demonstrate the capacity of  
64 vaccines to restrain MA10 infection and disease [14].

65 This model has not yet been utilized to study the characteristics of vaccine-elicited immune  
66 responses that protect against clinical disease and viral replication. Thus, we sought to test a series  
67 of candidate rhesus adenovirus serotype 52 (RhAd52) [18] vector-based vaccines expressing  
68 engineered versions of SARS-CoV-2 Spike. RhAd52 vectors have lower seroprevalence in human  
69 populations than Ad26 vectors, which recently received FDA Emergency Use Authorization as a

70 COVID-19 vaccine [19, 20]. We aimed to probe correlates of protection, including whether similar  
71 immune parameters such as neutralizing antibody titers emerge in the mouse model as predictors  
72 of challenge outcome, as has been observed in hamsters and nonhuman primates [9, 10, 21]. These  
73 data will inform applications of the MA10 virus to study key questions about clinical disease,  
74 infection, or both.

75

## 76 **Results**

### 77 **Immunogenicity of RhAd52 vectors**

78 We designed a series of replication incompetent viral vector vaccines using rhesus  
79 adenovirus serotype 52 (RhAd52) vectors [18, 22] that encode variations of the SARS-CoV-2  
80 Spike (S) protein (Fig 1A). Similar to our previous reports with human adenovirus serotype 26  
81 (Ad26) vectors [9, 23, 24], inserts included: i) unmodified S, ii) truncations of the cytoplasmic tail  
82 (S.dCT) or the transmembrane region (S.dTM), or iii) select fragments, including the S1 domain  
83 and the receptor binding domain (RBD). In some cases, immunogens were modified with mutation  
84 of the furin cleavage site and the addition of proline mutations to stabilize protein prefusion  
85 conformation (PP) [25-27]. To explore the potential of candidate RhAd52 vaccines to elicit  
86 humoral immune responses, groups of wild-type BALB/c mice were immunized with  $10^9$  viral  
87 particles (VPs) of these vaccines via the intramuscular route (Fig 1B). Peripheral blood was  
88 collected on a biweekly basis to monitor antibody responses in serum.

89 At week 2 following the initial immunization, 100% of mice immunized with RhAd52  
90 vaccines, irrespective of the immunogen insert, exhibited SARS-CoV-2 S-specific binding  
91 antibodies by enzyme-linked immunosorbent assay (ELISA) (Fig 1C). These responses generally  
92 increased over the time frame of 2-8 weeks post-prime. At week 8, RBD-specific binding

93 responses were also observed in 100% of mice immunized with RhAd52 candidates (Fig 1D).  
94 Furthermore, antibody function was assessed using *in vitro* assays to quantify the potential to  
95 neutralize either a pseudotyped virus [10, 28, 29] (Fig 1E) or live SARS-CoV-2 virus [10, 28, 30,  
96 31] (Fig 1F). Similar to the binding results, neutralizing titers were elicited by several of the  
97 RhAd52 candidate vaccines, with the lowest responses observed following immunization with the  
98 S1 domain insert, in which a subset of mice exhibited no detectable neutralizing responses at week  
99 8. Mice received a second identical dose of the respective RhAd52 vectors at week 8. Two weeks  
100 following the boost immunization, median S-specific ELISA titers were found to increase by  
101 approximately 10-fold for all the vaccine candidates (Fig 1G). These data demonstrate the  
102 immunogenicity of a homologous boost with a second immunization of a RhAd52 vector.

103         We next designed a series of immunization regimens that we hypothesized would i) allow  
104 direct comparison of protective efficacy of single-shot versus two-dose prime-boost schedules, and  
105 ii) generate a range of binding and neutralizing antibody responses that could enable analyses of  
106 correlates of protection following challenge [21, 24, 28]. Briefly, groups of mice were immunized  
107 with a prime and a matched boost with the seven candidate RhAd52 vaccines, as in Fig 1B. At the  
108 time of boost (i.e., week 8), additional groups of mice were immunized with a single dose of select  
109 vaccines, RhAd52.S, RhAd52.S.dCT, and RhAd52.S.PP. At week 12, serum was collected to  
110 assess antibody responses prior to viral challenge. Expansion of S-specific (Fig 2A) and RBD-  
111 specific (Fig 2B) binding antibody titers was again observed in all vaccinated mice. Groups of  
112 mice that received the two-dose regimens exhibited approximately one-log higher median titers  
113 compared with groups administered a single immunization. Furthermore, consistent with our  
114 previous data using a DNA vaccination platform in non-human primates [28], the S1 insert drove  
115 the lowest binding responses.

116 In evaluating neutralizing antibody activity elicited by these vaccine regimens, similar  
117 patterns were observed with pseudovirus (Fig 2C) and live virus (Fig 2D) assays. Among the  
118 groups administered prime-boost dosing schedules, high neutralizing antibody titers were  
119 observed across all vaccines with the exception of the S1 immunogen, for which 50%  
120 neutralization titer (NT50) values were below the assay limit of detection for several mice. Groups  
121 that received only one dose of select inserts exhibited lower neutralizing titers compared with  
122 boosted mice, with detectable responses in a subset of mice that, on average, were approximately  
123 one log lower than the boosted groups that received full length or truncated (e.g., S.dCT) vaccines.  
124 As consistent trends were observed across binding and neutralizing titers in the relative magnitude  
125 of responses elicited by various candidate vaccines, correlation analyses were performed to assess  
126 the relationship between these immunologic readouts (Fig 2E). Highly significant ( $P < 0.0001$ ,  
127 Spearman correlation) strong positive correlations were observed between binding ELISA titers to  
128 S and RBD proteins and capacity to neutralize either pseudovirus or live SARS-CoV-2 virus.

129

### 130 **Protective efficacy of RhAd52 vector vaccines against MA10 challenge**

131 At week 12, all groups of mice were challenged to evaluate whether vaccine-elicited  
132 responses protected from clinical disease and viral replication in this mouse-adapted model [14].  
133 Vaccinated mice were challenged on day 0 with  $10^4$  PFU SARS-CoV-2 MA10 via the intranasal  
134 route (Fig 3A). Half of the mice were followed through day 4 post-challenge and body weight was  
135 monitored daily for signs of clinical disease. At the terminal time point, lung tissue was collected,  
136 and outgrowth assays were performed to quantify replication-competent virus (i.e., plaque forming  
137 units (PFU) in this key respiratory tract tissue. In parallel, half of the mice were sacrificed at day  
138 2 post-challenge to measure virus in the lungs. We hypothesized this approach would allow

139 evaluation of the potential to restrain clinical symptoms of disease as well as enable a virologic  
140 endpoint at the time of typical peak viral load (i.e., day 2 post-challenge).

141 As expected, the sham control group exhibited significant weight loss following MA10  
142 challenge, with a median loss of 15.2% of body weight at day 4 post-challenge (Fig 3B-3C). All  
143 vaccine regimens provided robust protection from clinical signs of infection in terms of body  
144 weights ( $P < 0.0001$ , one-way ANOVA with Dunnett's multiple comparisons test), with body  
145 weight generally remaining stable irrespective of the RhAd52 insert or whether a single or two-  
146 dose vaccine regimen was employed. Analyses of lungs revealed differences in the level of  
147 replication-competent virus detected in respiratory tract tissues among mice largely protected from  
148 weight loss (Fig 4A). In sham control mice at day 2 post-challenge, high levels of virus were  
149 recovered from lung, with a median titer of  $3.1 \times 10^7$  PFU/lung (Fig 4B). In contrast, two-dose  
150 regimens with full-length (i.e., S, S.PP) or truncated (i.e., S.dCT, S.dTM, S.dTM.PP) S  
151 immunogens provided a dramatic reduction in viral titer, with a greater than a 6 log drop in median  
152 titer. In nearly all mice in these groups, no replication competent virus was recovered from the  
153 lungs (i.e., PFU < 100/lung). Immunization with two doses of the S fragment immunogens –  
154 RhAd52.S1 and RhAd52.RBD – restrained the level of virus in the lung, with a median titer of  $3.9$   
155  $\times 10^5$  and  $5.0 \times 10^3$  PFU/lung, respectively. Similarly, in the single-shot groups, RhAd52.S and  
156 RhAd52.S.dCT provided significant but incomplete protection, reducing the viral burden in the  
157 lung to  $3.3 \times 10^2$  and  $1.0 \times 10^4$  PFU/lung, respectively. Finally, a single shot of RhAd52.S.PP  
158 dramatically reduced viral load, with no detectable viral outgrowth from lung tissues in 100% of  
159 mice. Of note, the S.PP insert previously proved optimal in nonhuman primates [24] and was  
160 advanced into clinical trials [19, 20].

161 Similar analyses at day 4 revealed the level of virus in lung tissue was several logs lower

162 (median  $4.4 \times 10^4$  PFU/lung) than at day 2 post-challenge (Fig 4C), consistent with our previous  
163 finding that tissue viral loads peak at day 1-2 post-challenge and gradually resolve over  
164 approximately 7 days [14]. Across vaccine regimens, virus levels were largely below the limit of  
165 detection of the outgrowth assay, with low levels observed in a subset of mice in the RhAd52.S  
166 and RhAd52.S1 two-dose groups. Together, these data suggest that all vaccines led to a reduction  
167 in respiratory tract tissue viral loads at the typical peak of infection as well as significantly  
168 decreased the persistence of virus in the lungs.

169

### 170 **Exploration of immune correlates of protection**

171 We next evaluated possible correlations between vaccine-elicited immune responses prior  
172 to challenge and peak viral levels following challenge. A highly significant ( $P < 0.0001$ ) correlation  
173 was observed between pre-challenge S ELISA titers and peak (i.e., day 2) lung PFU (Fig 4D).  
174 Furthermore, the resulting Spearman correlation coefficient ( $R = -0.7499$ ) suggests a strong inverse  
175 relationship between pre-challenge binding antibody levels and virologic outcome post-challenge.  
176 Similar highly significant ( $P < 0.0001$ ) inverse correlations were observed between three additional  
177 pre-challenge immunologic metrics and viral replication in the lung: i) RBD ELISA titers ( $R = -$   
178  $0.7234$ ), ii) pseudovirus neutralization titers ( $R = -0.7446$ , and iii) live virus neutralization titers  
179 ( $R = -0.7744$ ). Together, these data suggest that multiple vaccine-elicited humoral immune  
180 responses are inversely correlated with viral replication in respiratory tract tissue following MA10  
181 SARS-CoV-2 challenge.

182

### 183 **Discussion**

184 Our data indicate that RhAd52 vectors expressing SARS-CoV-2 S antigens elicit robust



185 and protective humoral immune responses in mice. Based on baseline seroprevalence as well as  
186 the expanded global use of Ad5, Ad26, and ChAdOx1 vaccines [19, 20, 32-35], developing  
187 additional adenoviral vectors for COVID-19 vaccines is critical. This approach could be important  
188 for developing future boosting vectors or to tune the innate immune signatures induced [36].  
189 Similar to our recent reports in hamsters [9], non-human primates [24, 28], and humans [19], a  
190 robust correlation was observed between binding and neutralizing antibody responses.  
191 Furthermore, although single-shot vaccines were highly protective, we observed increased  
192 immune responses using a homologous prime-boost strategy. In particular, the expansion of  
193 neutralizing antibody responses, as measured by both pseudovirus and live virus assays, in mice  
194 is encouraging, as this metric has emerged as a potential correlate of protection in hamster and  
195 non-human primate challenge models [9, 10, 21, 24, 28].

196       Importantly, the MA10 virus has previously been shown to drive significant clinical disease  
197 (i.e., weight loss) as well as replication localized in respiratory tract tissues, characteristics of  
198 interest for modeling severe COVID-19 disease. In contrast, nonhuman primate models for  
199 COVID-19 generally do not develop severe clinical disease [10-13]. The MA10 mouse model has  
200 proven useful for screening candidate therapeutics, but it remains relatively unexplored for testing  
201 vaccines [14-17]. The results from our challenge studies using RhAd52 vaccines suggest that  
202 candidate vaccines significantly protected against clinical disease and virus replication in lung  
203 tissue. However, only select immunization regimens drove full suppression of replicating virus in  
204 the lungs, as measured by viral outgrowth assays. Moreover, our data show that the recently-  
205 reported mouse-adapted virus MA10 exhibits robust humoral immune correlates of vaccine  
206 protection [9, 10, 21], which will prove useful in future studies of vaccines and other interventions  
207 using this model.

208 Future studies could further explore mechanistic correlates of protection, such as defining  
209 how vaccine candidates tune systemic pro-inflammatory cytokine secretion typically triggered by  
210 viral infection, as well as exploring the role of T cell responses in the context of MA10 challenge.  
211 No signs of disease enhancement (e.g., enhanced weight loss) were observed with sub-protective  
212 immune responses, an important finding due to concerns of antibody-dependent enhancement.  
213 Together, these data support the MA10 mouse-adapted virus as a tool to screen vaccine candidates.  
214 This approach could help to test novel immunogens, delivery systems, or dosing regimens,  
215 harnessing a relatively high throughput, tractable small animal model, wild-type mice. These  
216 studies could be employed to identify promising approaches to advance to large animal pre-clinical  
217 and, subsequently, early clinical trials. Moreover, similar mouse challenge models could be  
218 developed for the newly described SARS-CoV-2 variants of concern.

219

## 220 **Materials and Methods**

### 221 **RhAd52 vectors.**

222 RhAd52 vectors were constructed with seven variants of the SARS-CoV-2 Spike (S)  
223 protein sequence (Wuhan/WIV04/2019; GenBank MN996528.1). Sequences were codon  
224 optimized and synthesized. Replication-incompetent, E1/E3-deleted RhAd52-vectors were  
225 produced in HEK 293B-55K.TetR cells as previously described [23], with the E1 region replaced  
226 by a transgene cassette encoding for the S sequence of interest. Vectors were sequenced and tested  
227 for expression before use.

228

### 229 **Animals and study design.**

230 Female BALB/c mice (The Jackson Laboratory) were randomly allocated to groups. Mice

231 received RhAd52 vectors expressing different versions of the SARS-CoV-2 S protein or sham  
232 controls ( $N=10$  per group). Animals received a single immunization of  $10^9$  viral particles (VPs)  
233 of RhAd52 vectors by the intramuscular route without adjuvant. In some cases, eight weeks later,  
234 mice received a homologous boost immunization. At indicated timepoints, peripheral blood was  
235 collected via the submandibular route to isolate serum for immunologic assays. For viral challenge,  
236 mice were administered  $1 \times 10^4$  PFU MA10 SARS-CoV-2 in a volume of  $50\mu\text{L}$  via the intranasal  
237 route [14]. Following challenge, body weights were assessed daily. Subsets of animals were  
238 euthanized on days 2 and 4 post-challenge for viral outgrowth assays. All animal studies were  
239 conducted in compliance with all relevant local, state and federal regulations and were approved  
240 by the Beth Israel Deaconess Medical Center and University of North Carolina at Chapel Hill  
241 Institutional Animal Care and Use Committees.

242

#### 243 **ELISA.**

244 S and RBD-specific binding antibodies were assessed by ELISA essentially as described  
245 [10, 28]. Briefly, plates were coated with  $1 \mu\text{g ml}^{-1}$  of SARS-CoV-2 S protein (Sino Biological)  
246 or SARS-CoV-2 RBD protein (Aaron Schmidt, Massachusetts Consortium on Pathogen  
247 Readiness), diluted in  $1\times$  PBS, and incubated at  $4^\circ\text{C}$  overnight. After incubation, plates were  
248 washed once with a wash buffer ( $0.05\%$  TWEEN-20 in  $1\times$  PBS) and blocked with  $350 \mu\text{l}$  of casein  
249 per well. The block solution was discarded after 2-3 hours of incubation at room temperature and  
250 plates were blotted dry. Three-fold serial dilutions of mouse serum in casein block were added to  
251 wells and plates were incubated for 1 hour at room temperature. Plates were then washed three  
252 times and rabbit anti-mouse IgG HRP (Jackson ImmunoResearch), diluted 1:1000 in casein block,  
253 was added to wells and incubated at room temperature in the dark. After 1 hour, plates were washed

254 three times, and 100  $\mu$ l of SeraCare KPL TMB SureBlue Start solution was added to each well.  
255 Development was halted with the addition of 100  $\mu$ l of SeraCare KPL TMB Stop solution per well.  
256 The absorbance at 450 nm was recorded using a VersaMax microplate reader. ELISA endpoint  
257 titers were defined as the highest reciprocal serum dilution that yielded an absorbance > 0.2. The  
258 raw OD values were transferred into GraphPad Prism for analysis. A standard curve was  
259 interpolated using a sigmoidal four-parameter logistic (4PL) fit. To quantify the endpoint titer, the  
260 interpolation function was used to calculate the dilution at which the OD value would be equal to  
261 a value of 0.2.

262

### 263 **Pseudovirus neutralization assay.**

264 A SARS-CoV-2 pseudovirus expressing a luciferase reporter gene was generated in an  
265 approach similar to as described previously [10, 28, 29]. Briefly, the packaging construct psPAX2  
266 (AIDS Resource and Reagent Program), luciferase reporter plasmid pLenti-CMV Puro-Luc  
267 (Addgene) and S protein expressing pcDNA3.1-SARS CoV-2 S.dCT were co-transfected into  
268 HEK293T cells using lipofectamine 2000 (Thermo Fisher Scientific). After 48 hours, supernatant  
269 was collected and pseudotype viruses were purified by filtration with a 0.45- $\mu$ m filter. To  
270 determine the neutralization activity of the antisera from vaccinated animals, HEK293T-hACE2  
271 target cells were seeded in 96-well tissue culture plates at a density of  $1.75 \times 10^4$  cells per well and  
272 incubated overnight. Three-fold serial dilutions of heat-inactivated serum were prepared and  
273 mixed with 50  $\mu$ l of pseudovirus. The mixture was incubated at 37 °C for 1 hour before adding to  
274 HEK293T-hACE2 cells. 48 hours after infection, cells were lysed in Steady-Glo Luciferase  
275 (Promega) according to the manufacturer's instructions. Neutralization titers were defined as the  
276 sample dilution at which a 50% reduction in relative light units was observed relative to the average

277 of the virus control wells.

278

### 279 **Live virus neutralization assay.**

280 Live virus neutralization of sera was determined using a nanoLuciferase-expressing SARS-  
281 CoV-2 virus (SARS-CoV-2-nLuc), bearing wild-type spike protein, as described [37, 38], with  
282 slight modification. Briefly, Vero E6 cells were seeded at  $2 \times 10^4$  cells per well in a 96-well plate  
283 24 hours before the assay. 90 PFU of SARS-CoV-2-nLuc virus were mixed with serial diluted sera  
284 at 1:1 ratio and incubated at 37 °C for 1hour. An 8-point, 3-fold dilution curve was generated for  
285 each sample with starting concentration of 1:20. Virus and serum mix was added to cells and  
286 incubated at 37 °C + 5% CO<sub>2</sub> for 48 hours. Luciferase activity was measured by Nano-Glo  
287 Luciferase Assay System (Promega) following manufacturer protocol using SpectraMax M3  
288 luminometer (Molecular Device). Fifty percent neutralization titer (NT50) was calculated in  
289 GraphPad Prism by fitting the data points to a sigmoidal dose-response (variable slope) curve.

290

### 291 **PFU assay.**

292 Lung viral titers were determined by plaque assay. Briefly, right caudal lung lobes were  
293 homogenized in 1mL PBS using glass beads and serial dilutions of the clarified lung homogenates  
294 were added to a monolayer of Vero E6 cells and overlaid with a solution of 0.8% agarose and  
295 media. After three days, plaques were visualized via staining with Neutral Red dye and counted.

296

### 297 **Acknowledgments**

298 We thank E. Hoffman, Z. Lin and R. Nityanandam for their generous advice, assistance, and  
299 reagents. We thank the veterinary and animal care teams at Beth Israel Deaconess Medical Center

300 and University of North Carolina at Chapel Hill, particularly Andrew Sumski, Johanna Harvel,  
301 Melanie Harrington, Megan Brockett, Janet Veloz, and William Valle, for their assistance with  
302 animal care and transportation. We acknowledge support from the NIH (T32 AI007387) to L.H.T.  
303 We acknowledge support from Burroughs Wellcome Fund (Postdoctoral Enrichment Program  
304 Award), Howard Hughes Medical Institute (Hanna H. Gray Fellowship), and NIH (T32  
305 AI007151, F32 AI152296) to D.R.M. We acknowledge support from the NIH (AI145372) to  
306 L.E.G. This project was supported by the North Carolina Policy Collaboratory at the University of  
307 North Carolina at Chapel Hill with funding from the North Carolina Coronavirus Relief Fund  
308 (North Carolina General Assembly). We acknowledge support from the Chan Zuckerberg  
309 Initiative and the NIH (1U19 AI142759, 5R01 AI132178, AI100625, AI108197,  
310 HHSN272201700036I, and U54CA260543) to R.S.B. We acknowledge support from the NIH  
311 (CA260476, OD024917, AI149670, AI128751, AI129797, AI126603, AI124377), MassCPR, and  
312 Ragon Institute of MGH, MIT, and Harvard to D.H.B.

313

### 314 **Author Contributions**

315 L.H.T., L.E.G., D.R.M., R.S.B., and D.H.B. designed and planned experiments. Z.F.L., J.L., and  
316 D.H.B. designed the RhAd52 vector vaccines. Z.F.L. and F.N. synthesized and characterized  
317 RhAd52 vectors. L.H.T. and S.H.M. performed the immunogenicity phase of the mouse studies.  
318 L.H.T., H.W., and K.A.M. performed ELISA assays. J.Y. and A.C. performed the pseudovirus  
319 neutralization assays. D.R.M. performed the live virus neutralization assays. D.R.M., L.E.G., and  
320 A.S. performed the MA10 challenge phase of the mouse studies. D.R.M., L.E.G., A.S., K.H.D.,  
321 and S.R.L. performed the viral outgrowth plaque assays. L.H.T., L.E.G., and D.R.M. analyzed data  
322 and performed statistical analyses. L.H.T. and D.H.B. wrote the manuscript with input from and

323 review by all authors.

324 **Figures and Figure Captions**

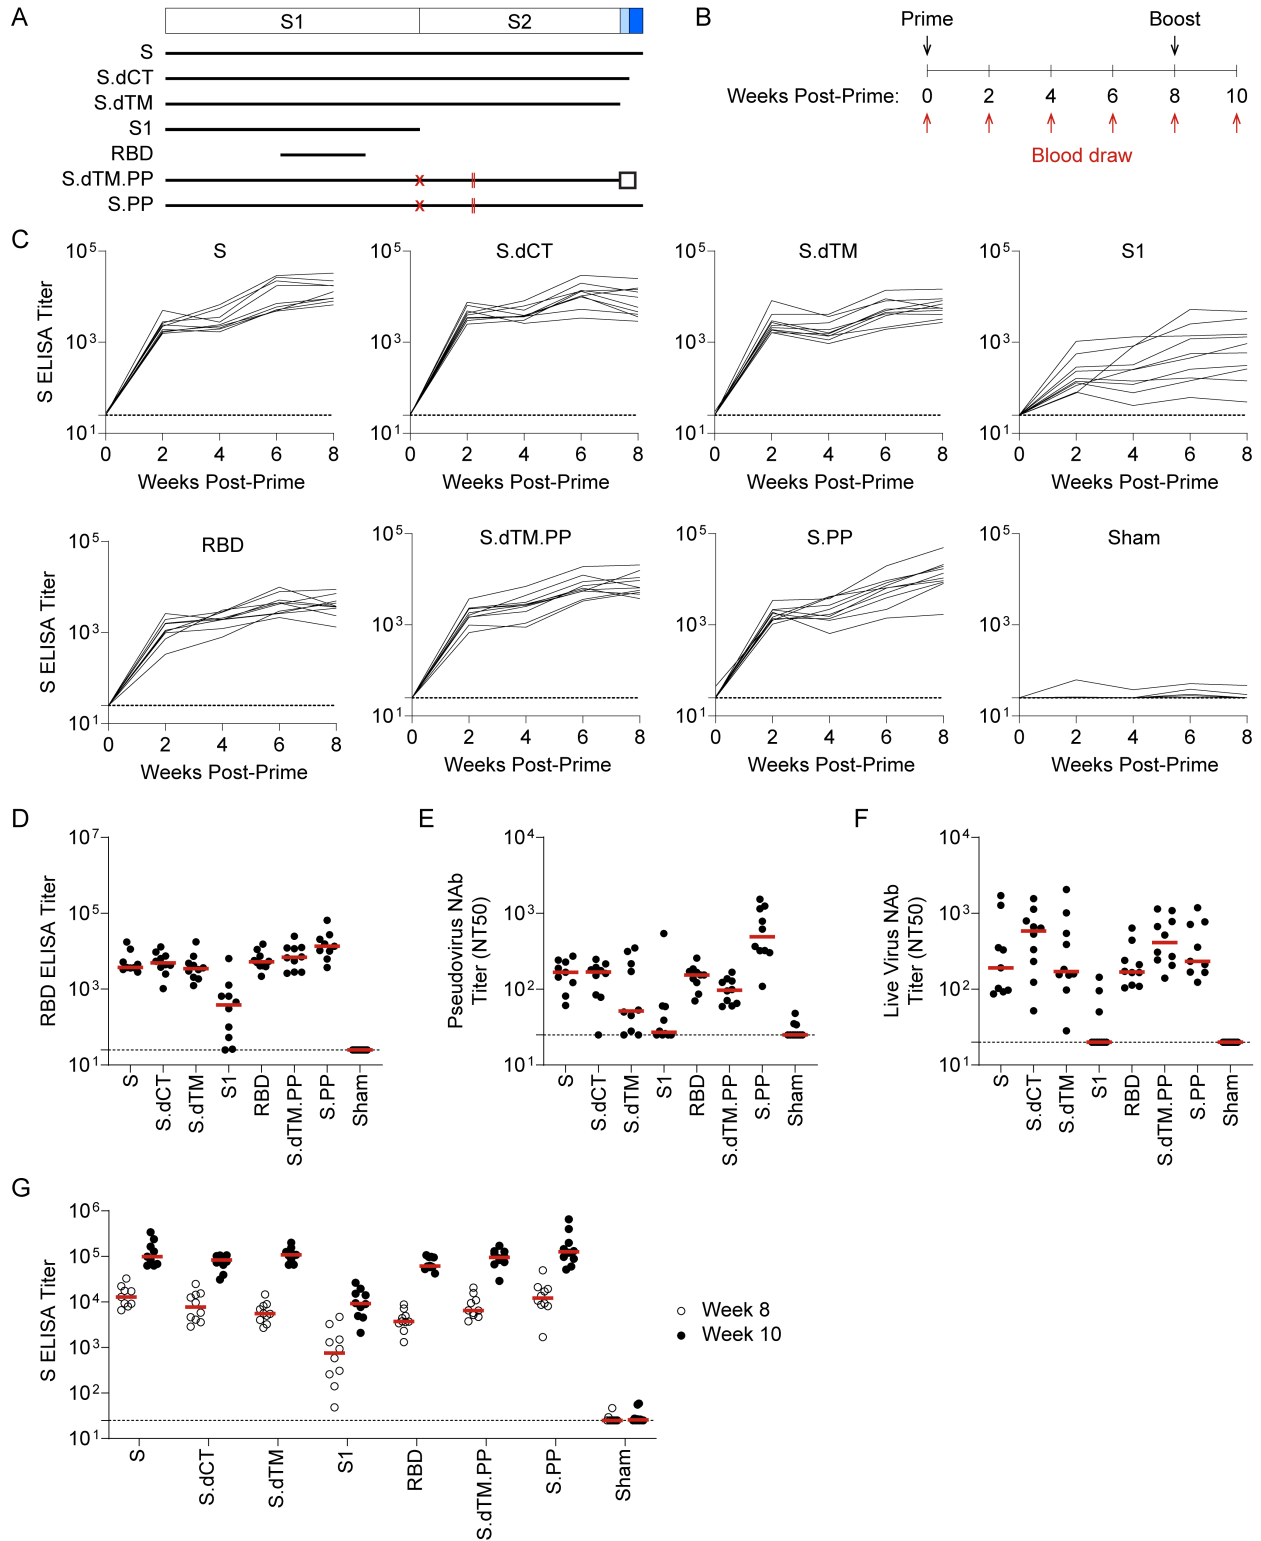

325 **Fig 1. RhAd52 vaccines elicit robust S-specific binding antibody responses.** A) A series of  
326 replication incompetent RhAd52 vectors, encoding for variations on the SARS-CoV-2 Spike (S)



327 protein, was designed. Inserts included i) S, ii) deletion of the cytoplasmic tail (S.dCT), iii) deletion  
328 of the transmembrane domain and cytoplasmic tail (S.dTM), iv) the S1 domain with a foldon  
329 trimerization tag, v) the receptor binding domain (RBD) a foldon trimerization tag, vi) deletion of  
330 the transmembrane domain and cytoplasmic tail, with mutation of the furin cleavage site (red X),  
331 addition of stabilizing proline mutations (red lines), and a foldon trimerization tag (S.dTM.PP),  
332 and vii) S with mutation of the furin cleavage site (red X) and addition of stabilizing proline  
333 mutations (red lines) (S.PP). B) To explore the immunogenicity of these vaccine candidates, wild-  
334 type BALB/c mice were immunized at week 0 with  $10^9$  viral particles (VPs) of candidate RhAd52  
335 vaccines or sham. Peripheral blood was collected at baseline and every two weeks following  
336 vaccination to monitor antibody responses in serum. Eight weeks post-prime, mice were  
337 administered a homologous boost to explore the potential to boost responses. C) For each RhAd52  
338 insert, as well as sham controls, S-specific binding antibody responses were quantified through  
339 enzyme-linked immunosorbent assay (ELISA) in serum every two weeks post-prime. D) The  
340 distribution of RBD-specific ELISA titers at week 8 across candidate RhAd52 vectors. Red lines  
341 indicate the median titer of each group. Neutralizing activity of vaccine-elicited antibody responses  
342 were assessed through E) pseudovirus or F) live SARS-CoV-2 virus *in vitro* neutralization assays.  
343 The 50% neutralization titer (NT50) is displayed, with the median of each vaccine regimen  
344 indicated with a red line. G) The distribution of S-specific ELISA titers at week 8 (open circles)  
345 and week 10 (two weeks post-boost, closed circles) was measured to characterize the  
346 immunogenicity of a homologous boost with candidate RhAd52 vaccines. Red lines indicate the  
347 median titer of each group. For panels C-G, N=9-10 mice/group and endpoint binding titers are  
348 reported. Representative data from one of two similar experiments are shown.

349  
350

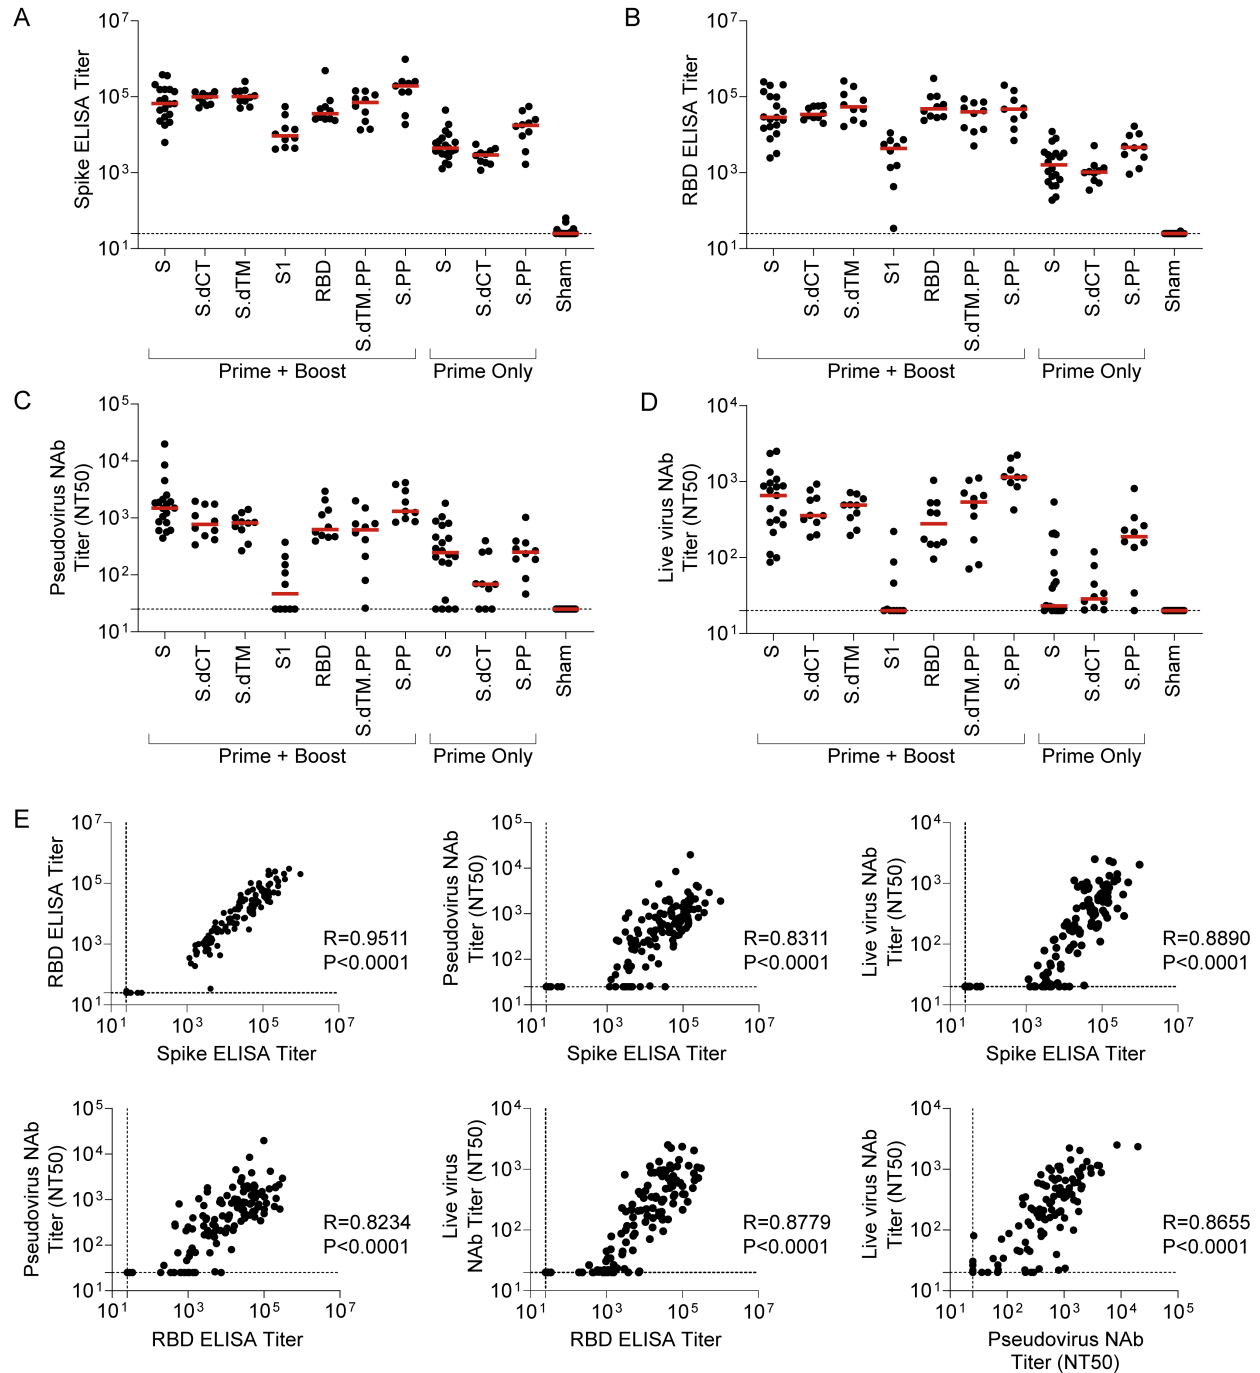

351  
 352 **Fig 2. Serum binding and neutralizing antibody responses are tightly linked following**  
 353 **RhAd52 vaccination.** Groups of mice were administered a prime (week 0) and a boost (week 8)  
 354 of  $10^9$  VP the indicated RhAd52 vaccines. At the time of boost (i.e., week 8), additional groups of  
 355 mice were administered a single dose (i.e., Prime Only) of  $10^9$  VP of select indicated RhAd52  
 356 vaccines. At week 12, serum was analyzed. A) S-specific and B) RBD-specific ELISA titers are  
 357 shown, with median titer for each regimen indicated with a red line. Neutralizing activity of  
 358 vaccine-elicited antibody responses were assessed through C) pseudovirus or D) live SARS-CoV-  
 359 2 virus neutralization assays. The 50% neutralization titer (NT50) is displayed, with the median of

360 each vaccine regimen indicated with a red line. E) Spearman correlation analyses of binding and  
361 neutralizing antibody responses are displayed. For panels A-E, data are pooled from two similar  
362 experiments. For panels A-D, N=9-10 mice/group for all regimens, with the exception of  
363 RhAd52.S Prime + Boost (N=19), RhAd52.S Prime Only (N=20), and Sham (N=23). In Panel E,  
364 data from all vaccine regimens are pooled to explore the relationship between binding and  
365 neutralizing antibody function independent of the RhAd52 insert.

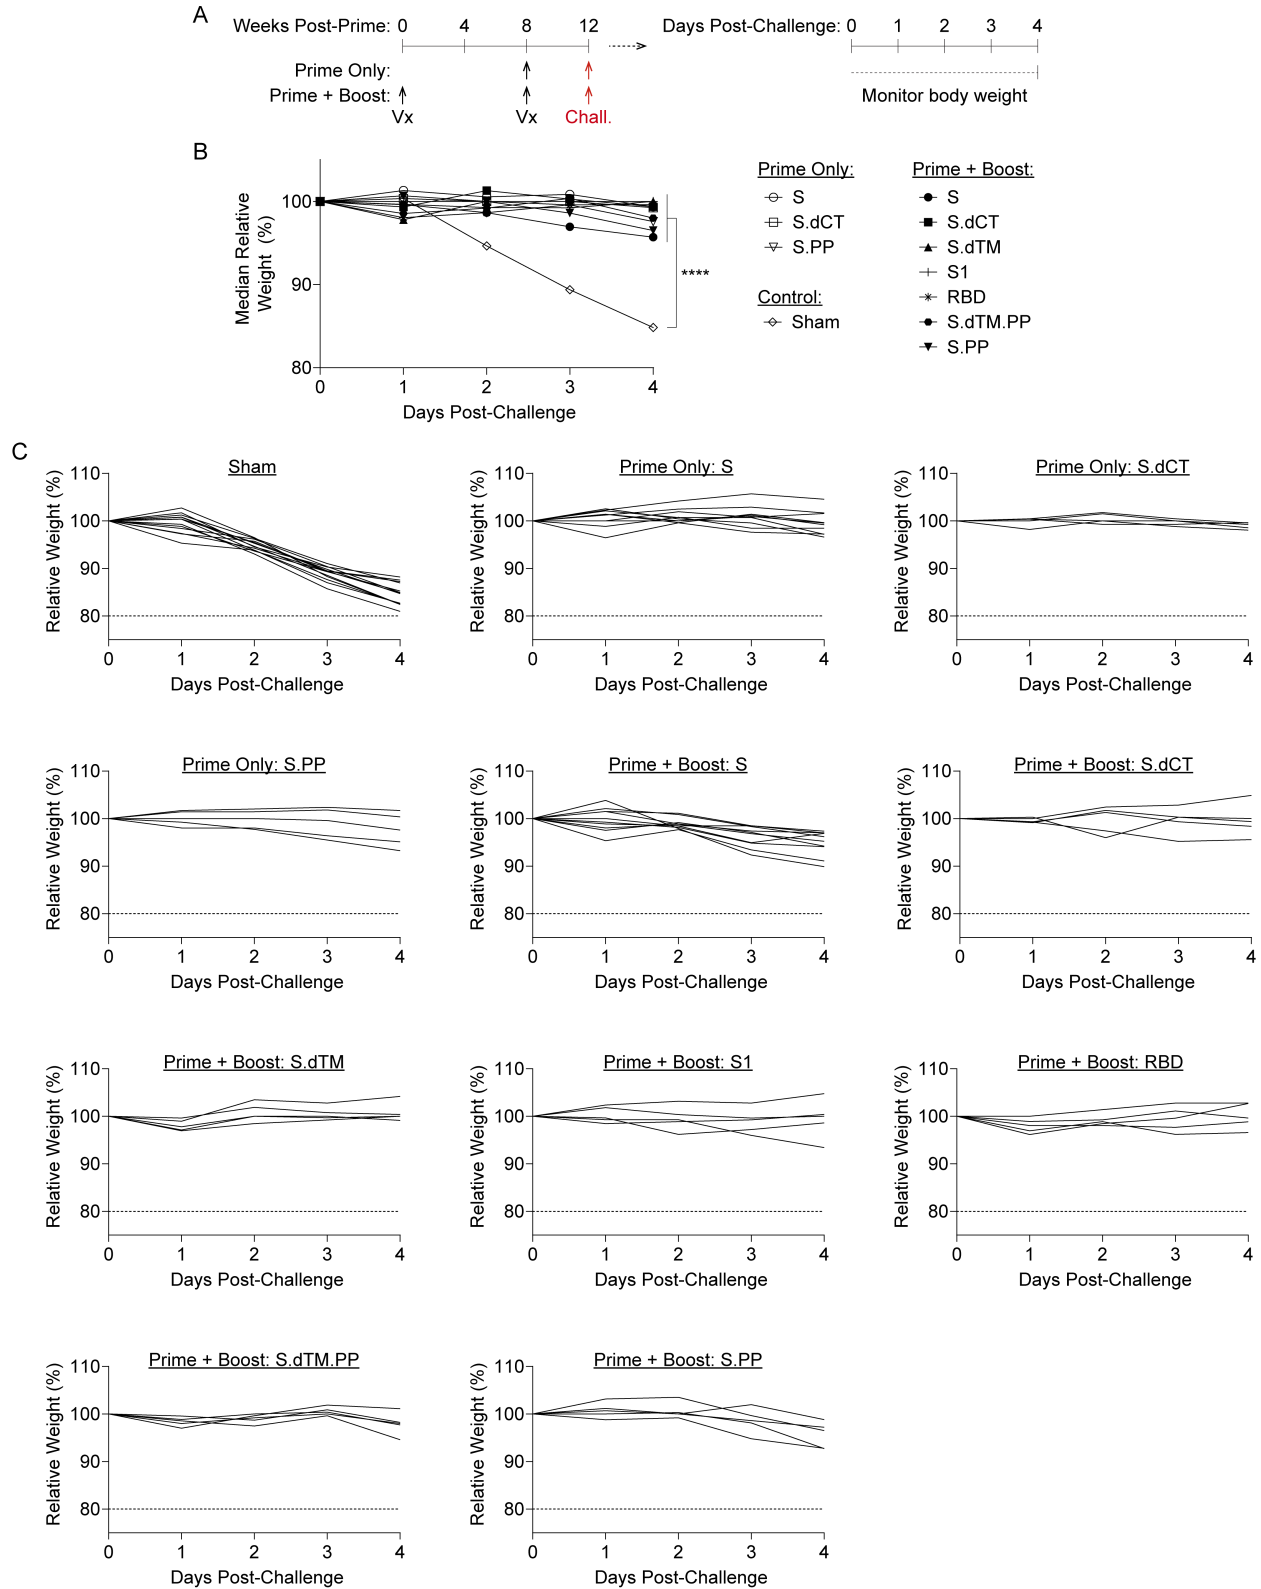

366 **Fig 3. RhAd52 vaccines protect from clinical disease following mouse-adapted SARS-CoV-**  
 367 **2 challenge.** A) Groups of mice were immunized with either a prime and boost or a prime only

368 of  $10^9$  viral particles (VPs) of RhAd52 candidate vaccines following the indicated timeline. At  
369 week 12, mice were challenged with  $10^4$  PFU of MA10 SARS-CoV-2 via the intranasal route.  
370 After challenge, a subset of mice was followed through day 4 post-challenge to monitor for signs  
371 of clinical disease. B) Relative body weight following MA10 SARS-CoV-2 challenge in mice  
372 immunized with the indicated vaccine regimens. Median value of each group is displayed.  
373  $P < 0.0001$  indicates results of a one-way ANOVA analysis followed by Dunnett's multiple  
374 comparisons, comparing vaccinated groups to the sham control group. C) Traces of relative body  
375 weight in individual mice, immunized with the indicated RhAd52 vaccine regimen, following  
376 challenge. For panels B-C, data are pooled from two similar experiments.  $N = 5$  mice/group for all  
377 regimens, with the exception of RhAd52.S Prime + Boost ( $N = 10$ ), RhAd52.S Prime Only  
378 ( $N = 10$ ), and Sham ( $N = 13$ ).

379

380

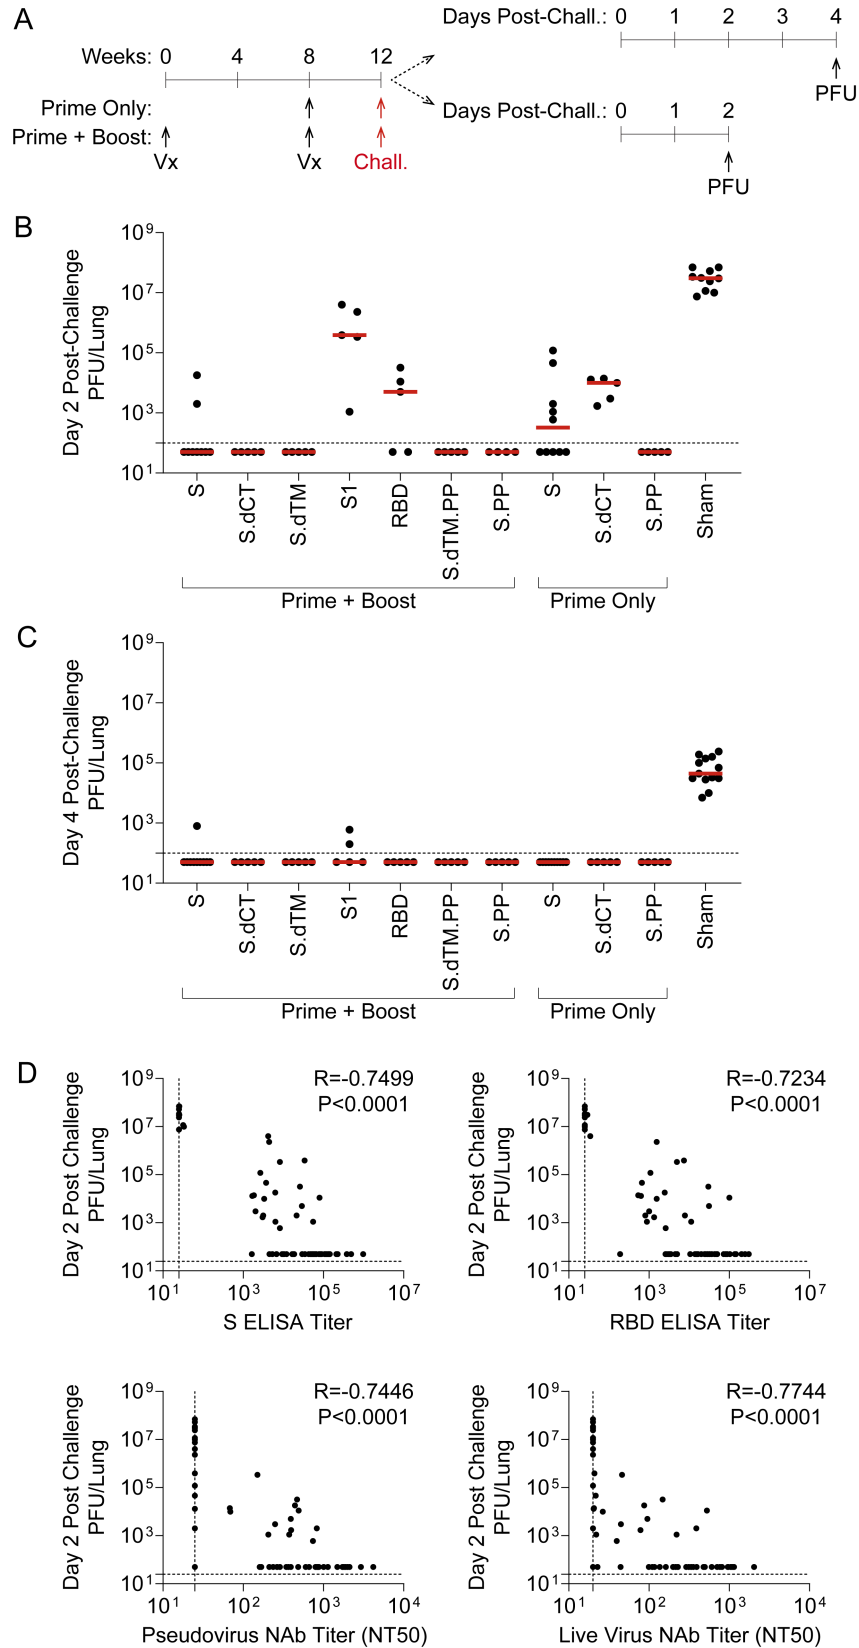

381 **Fig 4. RhAd52 vaccine-elicited antibody responses link to restraint of viral replication in the**  
 382 **lung following mouse-adapted SARS-CoV-2 challenge.** A) Groups of mice were immunized

383 with either a prime and a boost or a prime only of  $10^9$  viral particles (VPs) of RhAd52 candidate  
384 vaccines. At week 12, mice were challenged with  $10^4$  PFU of MA10 SARS-CoV-2 via the  
385 intranasal route. A subset of mice was monitored through day 4 post-challenge; at the terminal  
386 timepoint, lungs were harvested to measure virus via outgrowth assays to quantify plaque forming  
387 units (PFU) per tissue. The second subset of mice were followed through day 2 post-challenge for  
388 similar PFU assays at the time of peak viral replication. B-C) Quantification of PFU per lung at  
389 B) day two and C) day 4 post challenge. Median of each group indicated by the red line. N=4-5  
390 mice/group for all regimens, with the exception of RhAd52.S Prime + Boost (N=9), RhAd52.S  
391 Prime Only (N=10), and Sham (N=10). D) Spearman correlation analyses of pre-challenge serum  
392 binding or neutralizing antibody responses with day two post-challenge viral titers in lung are  
393 displayed. For panels B-C, data are pooled from two similar experiments. In Panel E, data from all  
394 vaccine regimens are pooled to explore the relationship between pre-challenge binding and  
395 neutralizing antibody responses and virologic endpoint independent of the RhAd52 insert.

## 396 **References**

- 397 1. Bao L, Deng W, Huang B, Gao H, Liu J, Ren L, et al. The pathogenicity of SARS-CoV-2 in  
398 hACE2 transgenic mice. *Nature*. 2020;583(7818):830-3.
- 399 2. Rathnasinghe R, Strohmeier S, Amanat F, Gillespie VL, Krammer F, Garcia-Sastre A, et al.  
400 Comparison of transgenic and adenovirus hACE2 mouse models for SARS-CoV-2 infection.  
401 *Emerg Microbes Infect*. 2020;9(1):2433-45.
- 402 3. Zheng J, Wong LR, Li K, Verma AK, Ortiz ME, Wohlford-Lenane C, et al. COVID-19  
403 treatments and pathogenesis including anosmia in K18-hACE2 mice. *Nature*.  
404 2021;589(7843):603-7.
- 405 4. Sun SH, Chen Q, Gu HJ, Yang G, Wang YX, Huang XY, et al. A Mouse Model of SARS-  
406 CoV-2 Infection and Pathogenesis. *Cell Host Microbe*. 2020;28(1):124-33.e4.
- 407 5. Hassan AO, Case JB, Winkler ES, Thackray LB, Kafai NM, Bailey AL, et al. A SARS-CoV-  
408 2 Infection Model in Mice Demonstrates Protection by Neutralizing Antibodies. *Cell*.  
409 2020;182(3):744-53.e4.
- 410 6. Sia SF, Yan LM, Chin AWH, Fung K, Choy KT, Wong AYL, et al. Pathogenesis and  
411 transmission of SARS-CoV-2 in golden hamsters. *Nature*. 2020;583(7818):834-8.
- 412 7. Imai M, Iwatsuki-Horimoto K, Hatta M, Loeber S, Halfmann PJ, Nakajima N, et al. Syrian  
413 hamsters as a small animal model for SARS-CoV-2 infection and countermeasure  
414 development. *Proc Natl Acad Sci U S A*. 2020;117(28):16587-95.
- 415 8. Chan JF, Zhang AJ, Yuan S, Poon VK, Chan CC, Lee AC, et al. Simulation of the Clinical and  
416 Pathological Manifestations of Coronavirus Disease 2019 (COVID-19) in a Golden Syrian  
417 Hamster Model: Implications for Disease Pathogenesis and Transmissibility. *Clin Infect Dis*.  
418 2020;71(9):2428-46.
- 419 9. Tostanoski LH, Wegmann F, Martinot AJ, Loos C, McMahan K, Mercado NB, et al. Ad26  
420 vaccine protects against SARS-CoV-2 severe clinical disease in hamsters. *Nat Med*.  
421 2020;26(11):1694-700.
- 422 10. Chandrashekar A, Liu J, Martinot AJ, McMahan K, Mercado NB, Peter L, et al. SARS-CoV-  
423 2 infection protects against rechallenge in rhesus macaques. *Science*. 2020;369(6505):812-7.
- 424 11. Munster VJ, Feldmann F, Williamson BN, van Doremalen N, Perez-Perez L, Schulz J, et al.  
425 Respiratory disease in rhesus macaques inoculated with SARS-CoV-2. *Nature*.  
426 2020;585(7824):268-72.
- 427 12. Rockx B, Kuiken T, Herfst S, Bestebroer T, Lamers MM, Oude Munnink BB, et al.  
428 Comparative pathogenesis of COVID-19, MERS, and SARS in a nonhuman primate model.  
429 *Science*. 2020;368(6494):1012-5.
- 430 13. Munoz-Fontela C, Dowling WE, Funnell SGP, Gsell PS, Riveros-Balta AX, Albrecht RA, et  
431 al. Animal models for COVID-19. *Nature*. 2020;586(7830):509-15.



- 432 14. Leist SR, Dinnon KH, 3rd, Schafer A, Tse LV, Okuda K, Hou YJ, et al. A Mouse-Adapted  
433 SARS-CoV-2 Induces Acute Lung Injury and Mortality in Standard Laboratory Mice. *Cell*.  
434 2020;183(4):1070-85 e12.
- 435 15. Martinez DR, Schaefer A, Leist SR, Gully K, Feng JY, Bunyan E, et al. Early therapy with  
436 remdesivir and antibody combinations improves COVID-19 disease in mice. *bioRxiv*.  
437 2021:2021.01.27.428478.
- 438 16. Martinez DR, Schaefer A, Leist SR, De la Cruz G, West A, Atochina-Vasserman EN, et al.  
439 Chimeric spike mRNA vaccines protect against sarbecovirus challenge in mice. *bioRxiv*.  
440 2021:2021.03.11.434872.
- 441 17. Rappazzo CG, Tse LV, Kaku CI, Wrapp D, Sakharkar M, Huang D, et al. Broad and potent  
442 activity against SARS-like viruses by an engineered human monoclonal antibody. *Science*.  
443 2021;371(6531):823-9.
- 444 18. Abbink P, Maxfield LF, Ng'ang'a D, Borducchi EN, Iampietro MJ, Bricault CA, et al.  
445 Construction and evaluation of novel rhesus monkey adenovirus vaccine vectors. *J Virol*.  
446 2015;89(3):1512-22.
- 447 19. Sadoff J, Le Gars M, Shukarev G, Heerwegh D, Truyers C, de Groot AM, et al. Interim Results  
448 of a Phase 1-2a Trial of Ad26.COV2.S Covid-19 Vaccine. *N Engl J Med*. 2021.
- 449 20. Stephenson KE, Le Gars M, Sadoff J, de Groot AM, Heerwegh D, Truyers C, et al.  
450 Immunogenicity of the Ad26.COV2.S Vaccine for COVID-19. *JAMA*. 2021.
- 451 21. McMahan K, Yu J, Mercado NB, Loos C, Tostanoski LH, Chandrashekar A, et al. Correlates  
452 of protection against SARS-CoV-2 in rhesus macaques. *Nature*. 2021;590(7847):630-4.
- 453 22. Abbink P, Kirilova M, Boyd M, Mercado N, Li Z, Nityanandam R, et al. Rapid Cloning of  
454 Novel Rhesus Adenoviral Vaccine Vectors. *J Virol*. 2018;92(6):e01924-17.
- 455 23. Abbink P, Lemckert AA, Ewald BA, Lynch DM, Denholtz M, Smits S, et al. Comparative  
456 seroprevalence and immunogenicity of six rare serotype recombinant adenovirus vaccine  
457 vectors from subgroups B and D. *J Virol*. 2007;81(9):4654-63.
- 458 24. Mercado NB, Zahn R, Wegmann F, Loos C, Chandrashekar A, Yu J, et al. Single-shot Ad26  
459 vaccine protects against SARS-CoV-2 in rhesus macaques. *Nature*. 2020;586(7830):583-8.
- 460 25. Kirchdoerfer RN, Cottrell CA, Wang N, Pallesen J, Yassine HM, Turner HL, et al. Pre-fusion  
461 structure of a human coronavirus spike protein. *Nature*. 2016;531(7592):118-21.
- 462 26. Pallesen J, Wang N, Corbett KS, Wrapp D, Kirchdoerfer RN, Turner HL, et al.  
463 Immunogenicity and structures of a rationally designed prefusion MERS-CoV spike antigen.  
464 *Proc Natl Acad Sci U S A*. 2017;114(35):E7348-E57.
- 465 27. Wrapp D, Wang N, Corbett KS, Goldsmith JA, Hsieh CL, Abiona O, et al. Cryo-EM structure  
466 of the 2019-nCoV spike in the prefusion conformation. *Science*. 2020;367(6483):1260-3.
- 467 28. Yu J, Tostanoski LH, Peter L, Mercado NB, McMahan K, Mahrokhian SH, et al. DNA vaccine  
468 protection against SARS-CoV-2 in rhesus macaques. *Science*. 2020;369(6505):806-11.

- 469 29. Yang Z-y, Kong W-p, Huang Y, Roberts A, Murphy BR, Subbarao K, et al. A DNA vaccine  
470 induces SARS coronavirus neutralization and protective immunity in mice. *Nature*.  
471 2004;428(6982):561-4.
- 472 30. Scobey T, Yount BL, Sims AC, Donaldson EF, Agnihothram SS, Menachery VD, et al.  
473 Reverse genetics with a full-length infectious cDNA of the Middle East respiratory syndrome  
474 coronavirus. *Proc Natl Acad Sci U S A*. 2013;110(40):16157-62.
- 475 31. Yount B, Curtis KM, Fritz EA, Hensley LE, Jahrling PB, Prentice E, et al. Reverse genetics  
476 with a full-length infectious cDNA of severe acute respiratory syndrome coronavirus. *Proc*  
477 *Natl Acad Sci U S A*. 2003;100(22):12995-3000.
- 478 32. Logunov DY, Dolzhikova IV, Shcheblyakov DV, Tukhvatulin AI, Zubkova OV, Dzharullaeva  
479 AS, et al. Safety and efficacy of an rAd26 and rAd5 vector-based heterologous prime-boost  
480 COVID-19 vaccine: an interim analysis of a randomised controlled phase 3 trial in Russia.  
481 *Lancet*. 2021;397(10275):671-81.
- 482 33. Voysey M, Clemens SAC, Madhi SA, Weckx LY, Folegatti PM, Aley PK, et al. Safety and  
483 efficacy of the ChAdOx1 nCoV-19 vaccine (AZD1222) against SARS-CoV-2: an interim  
484 analysis of four randomised controlled trials in Brazil, South Africa, and the UK. *Lancet*.  
485 2021;397(10269):99-111.
- 486 34. Folegatti PM, Ewer KJ, Aley PK, Angus B, Becker S, Belij-Rammerstorfer S, et al. Safety and  
487 immunogenicity of the ChAdOx1 nCoV-19 vaccine against SARS-CoV-2: a preliminary  
488 report of a phase 1/2, single-blind, randomised controlled trial. *Lancet*. 2020;396(10249):467-  
489 78.
- 490 35. Logunov DY, Dolzhikova IV, Zubkova OV, Tukhvatulin AI, Shcheblyakov DV, Dzharullaeva  
491 AS, et al. Safety and immunogenicity of an rAd26 and rAd5 vector-based heterologous prime-  
492 boost COVID-19 vaccine in two formulations: two open, non-randomised phase 1/2 studies  
493 from Russia. *Lancet*. 2020;396(10255):887-97.
- 494 36. Teigler JE, Iampietro MJ, Barouch DH. Vaccination with adenovirus serotypes 35, 26, and 48  
495 elicits higher levels of innate cytokine responses than adenovirus serotype 5 in rhesus  
496 monkeys. *J Virol*. 2012;86(18):9590-8.
- 497 37. Hou YJ, Okuda K, Edwards CE, Martinez DR, Asakura T, Dinno KH, 3rd, et al. SARS-CoV-  
498 2 Reverse Genetics Reveals a Variable Infection Gradient in the Respiratory Tract. *Cell*.  
499 2020;182(2):429-46 e14.
- 500 38. Dinno KH, 3rd, Leist SR, Schafer A, Edwards CE, Martinez DR, Montgomery SA, et al. A  
501 mouse-adapted model of SARS-CoV-2 to test COVID-19 countermeasures. *Nature*.  
502 2020;586(7830):560-6.
